1 Microbial communities in an ultra-oligotrophic sea are more affected by season than by distance  
2 from shore

3  
4 Markus Haber<sup>1,2</sup>, Dalit Roth Rosenberg<sup>1</sup>, Maya Lalzar<sup>3</sup>, Ilia Burgsdorf<sup>1</sup>, Kumar Saurav<sup>1</sup>, Regina  
5 Lionheart<sup>4</sup>, Yoav Lehahn<sup>4</sup>, Dikla Aharonovich<sup>1</sup>, Daniel Sher<sup>1</sup>, Michael D. Krom<sup>1,5</sup>, Laura  
6 Steindler<sup>1\*</sup>

7  
8 <sup>1</sup> Department of Marine Biology, Leon H. Charney School of Marine Sciences, University of  
9 Haifa, Israel

10 <sup>2</sup> Department of Aquatic Microbial Ecology, Institute of Hydrobiology, Biology Centre CAS,  
11 Czech Republic

12 <sup>3</sup> Bioinformatics Service Unit, University of Haifa, Israel

13 <sup>4</sup> The Dr. Moses Strauss Department of Marine Geosciences, Leon H. Charney School of Marine  
14 Sciences, University of Haifa, Israel

15 <sup>5</sup> Morris Kahn Marine Research Station, Environmental Geochemistry Lab., Leon H. Charney  
16 School of Marine Sciences, University of Haifa, Israel

17 \* Corresponding author: Dr. Laura Steindler

18 Department of Marine Biology, Leon H. Charney School of Marine Sciences, University  
19 of Haifa, 199 Aba Khoushy Ave. Mount Carmel, Haifa, 3498838, Israel

20 Phone: +972-4-8288987 Fax: +972-4-8288267 Email: [lsteindler@univ.haifa.ac.il](mailto:lsteindler@univ.haifa.ac.il)

21

22 **Running title:** Seasonality of microbial communities in the EMS

23 **Keywords:** Mediterranean Sea, SAR11, Transect, Seasonality, 16S rRNA

## 24 **Abstract**

25 Marine microbial communities vary seasonally and spatially, but these two factors are rarely  
26 addressed together. We studied temporal and spatial patterns of the microbial community  
27 structure and activity along a coast to offshore transect from the Israeli coast of the Eastern  
28 Mediterranean Sea (EMS) over six cruises, in three seasons of two consecutive years. The ultra-  
29 oligotrophic status of the South Eastern Mediterranean Sea was reflected in the microbial  
30 community composition that was dominated by oligotrophic microbial groups such as SAR11  
31 throughout the year, even at the most coastal station sampled. Seasons affected microbial  
32 communities much more than distance from shore explaining about half of the observed  
33 variability in the microbial community, compared to only about 6% that was explained by  
34 station. However, the most coastal site differed significantly in community structure and activity  
35 from the three further offshore stations in early winter and summer, but not in spring. Our data  
36 on the microbial community composition and its seasonality from a transect into the South  
37 Eastern Levantine basin support the notion that the EMS behaves similar to open gyres rather  
38 than an inland sea.

39

## 40 **Introduction**

41 Marine microbial communities play a pivotal function in the biogeochemistry of the ocean  
42 because of their key roles in the carbon, nitrogen and sulfur cycles (Falkowski et al. 2008). Their  
43 composition is strongly affected by seasons with recurring microbial turnover over different  
44 years as revealed by oceanographic time series studies conducted both at offshore stations (*e.g.*  
45 Bermuda Atlantic Time-Series Study (BATS) in the Western Atlantic Ocean and the Hawaii  
46 Ocean Time-series (HOT) in the North Pacific subtropical gyre (Giovannoni and Vergin 2012))

47 and more coastal affected sites (*e.g.* the San Pedro Ocean Time Series (SPOTS) in southern  
48 California (Fuhrman et al. 2006) and the western English Channel (Gilbert et al. 2012)). Spatial  
49 variability of marine surface water microbial communities has been reported at various scales  
50 (Ghiglione et al. 2005; Sunagawa et al. 2015). The observed differences were linked to gradients  
51 in environmental conditions (Fortunato et al. 2011; Sunagawa et al. 2015; Wang et al. 2019) and  
52 distinct water masses with different physico-chemical properties (Dubinsky et al. 2017; Morales  
53 et al. 2018). Spatial variability due to environmental gradients is especially evident when  
54 comparing nearshore and offshore microbial communities as parameters such as nutrient  
55 availability, temperature, dissolved organic matter, and, especially at estuaries, salinity change  
56 from the coast to the open ocean (Ghiglione et al. 2005; Fortunato et al. 2011; Quero and Luna  
57 2014; Lucas et al. 2016; Wang et al. 2019). These parameters are influenced by season leading to  
58 weakening or strengthening of the environmental gradients along coast to offshore transects. Few  
59 studies have followed seasonal differences in the microbial community dynamics over a coastal  
60 to offshore transect (Fortunato et al. 2011; Lucas et al. 2016; Wang et al. 2019), so relatively  
61 little is known about how these temporal and spatial changes interact and affect the microbial  
62 community composition and their functional potential. Only one of these studies (Wang et al.  
63 2019) addressed community structure changes without the confounding factor of salinity, which  
64 has been identified as a key factor in structuring microbial communities at estuaries (Fortunato et  
65 al. 2011).

66 Here we followed the seasonal dynamics of microbial communities along a coast to offshore  
67 transect in the ultra-oligotrophic Eastern Mediterranean Sea (EMS). This mostly land-enclosed  
68 region, represents the largest body of water that is severely depleted in phosphate (Krom et al.  
69 1991), and one of the most oligotrophic oceanic regions on Earth (Krom et al. 2010). Despite

70 being an inland sea with major anthropogenic external nutrient supply, it has been suggested that  
71 it behaves similar to open ocean gyres as a result of its unusual anti-estuarine circulation (Powley  
72 et al. 2017). The nutrient cycle at offshore sites in the EMS follows predictable patterns. During  
73 summer the water column is well stratified with a distinct deep chlorophyll maximum (DCM)  
74 and very low nutrient content in the surface waters (Kress and Herut 2001; Krom et al. 2014). In  
75 winter, as a result of increasingly deep-water mixing, dissolved nutrients are advected into the  
76 photic zone. Due to local weather conditions (short cold and wet (often stormy) periods  
77 interspersed with clear sunny ones), the phytoplankton bloom in this region starts soon after the  
78 nutrients are supplied to the photic zone and increases throughout the winter to a maximum in  
79 late winter (Krom et al. 2014). The dissolved phosphate in surface waters is consumed during the  
80 winter phytoplankton bloom, while measurable nitrate persists (Krom et al. 1992). In the summer  
81 autotrophs in offshore waters of this region tend to be phosphate and nitrogen co-limited, while  
82 heterotrophic bacteria are either phosphate or phosphate and nitrogen co-limited (Thingstad et al.  
83 2005; Tanaka et al. 2011; Tsiola et al. 2016). Detailed molecular characterization of the  
84 microbial community in this geographic area are limited to few studies that represent only  
85 snapshots of the microbial communities taken at a single time point (Feingersch et al. 2010;  
86 Keuter et al. 2015; Dubinsky et al. 2017). Until now molecular studies investigating seasonal and  
87 spatial differences in the microbial community structure focused on nitrogen fixing microbes  
88 using clone libraries of the *nifH* (Man-Aharonovich et al. 2007; Yogev et al. 2011). However,  
89 nitrogen fixation seems rare in the euphotic zone of the Eastern Mediterranean (Yogev et al.  
90 2011) and thus these microbes are not expected to reflect a large part of the microbial  
91 community. The goal of the present study was to examine both microbial community structure  
92 and activity in time and space by amplicon sequencing of 16S rRNA genes and transcripts.

93 Surface seawater samples (10 m) were collected along a coastal-to-offshore transect in three  
94 seasons (early winter, spring and summer) and for two consecutive years. The oceanographic  
95 status of the system was determined from physical, chemical and remote sensing measurements,  
96 and the phytoplankton community analyzed by flow cytometry and pigment analysis.

97

## 98 **Material and Methods**

### 99 *Sampling*

100 Six one-day cruises were performed onboard the R/V Mediterranean Explorer over a two-year  
101 period: two in early winter (December 1<sup>st</sup>, 2014; November 17<sup>th</sup>, 2015), two in spring (March  
102 24<sup>th</sup>, 2015; March 30<sup>th</sup>, 2016) and two in summer (July 14<sup>th</sup>, 2015; July 25<sup>th</sup>, 2016). Cruises  
103 followed the same coastal to offshore transect heading out from the Herzliya marina, Israel  
104 (Figure 1). Four stations, labeled station 1 to 4 in coastal to offshore order, were analyzed for  
105 different *in situ* parameters using a conductivity, temperature and depth (CTD) probe. Seawater  
106 was collected from 10 m depth using twelve 8L Niskin bottles mounted on a rosette for nutrient,  
107 pigment, cell count, DNA and RNA analyses. To better identify gradients along the transect,  
108 CTD and nutrient data were collected for two additional stations: one located between stations 1  
109 and 2, and the other between station 2 and 3. Station coordinates, bottom depths, distance  
110 between stations and to the shore are summarized in Supplementary Table S1.

111

### 112 *CTD data and surface chlorophyll a maps*

113 Satellite-based maps of surface chlorophyll concentration are derived from the Copernicus  
114 Marine Environment Monitoring Service (CMEMS, <http://marine.copernicus.eu/services-portfolio/access-to-products/>). We used the level-3 Mediterranean Sea reprocessed surface

116 chlorophyll concentration  
117 (OCEANCOLOUR\_MED\_CHL\_L3\_REP\_OBSERVATIONS\_009\_073) product, which  
118 consists of merged SeaWiFS, MODIS-Aqua, MERIS and VIIRS satellite data. Using multi-  
119 satellite data allows continuous tracking of fine-scale chlorophyll filaments as they are advected  
120 and deformed by the currents (Lehahn et al. 2017). Surface chlorophyll concentration are  
121 estimated via the MedOC4 (Volpe et al. 2007) and the AD4 (D'Alimonte and Zibordi 2003)  
122 algorithms for case-1 and case-2 waters, respectively. Spatial and temporal resolution is 1 km  
123 and 1 day, respectively.

124 A SeaBird CTD profiler (SBE 19plus V2) was used to measure vertical profiles of temperature  
125 and salinity up to a depth of 500 m. Chlorophyll *a* fluorescence profiles were measured with a  
126 Seapoint fluorometer calibrated with bottle chlorophyll measurements and turbidity profiles with  
127 a Seapoint turbidity sensor, both mounted on the CTD. Data were extracted using the Seasoft V2  
128 software suite and plotted using Ocean Data View 4.7.4 (Schlitzer R. 2015, <http://odv.awi.de>).

129

### 130 *Nutrient analysis*

131 Seawater for nutrient analysis was collected in 15 ml Falcon tubes pre-rinsed with sample  
132 seawater. For each nutrient, duplicate non-filtered samples were frozen onboard directly after  
133 collection and kept at -20°C until analysis of silicate, nitrate+nitrite and soluble reactive  
134 phosphate content (within six weeks) at the service unit of the Interuniversity Institute for Marine  
135 Sciences in Eilat, Israel. During the July 2016 cruise the same nutrients plus ammonia were also  
136 measured in non-frozen samples. These samples were filtered through 0.4 µm filters, transferred  
137 into 15 ml Falcon tubes, stored at 4°C and analysed within 24 hours at the Morris Kahn Marine

138 Laboratory, Sdot Yam, Israel using a SEAL AA-3 autoanalyzer. Methods are described in the  
139 Supplementary method information.

140

#### 141 *Flow cytometry*

142 For flow cytometry sample collection, 1.5 ml triplicate seawater samples were fixed with  
143 glutaraldehyde (0.125% final concentration), incubated in the dark for 10 min, stored in liquid  
144 nitrogen onboard and kept at -80 °C in the lab until analysis. Then, samples were thawed at room  
145 temperature and run on a BD FACSCanto™ II Flow Cytometry Analyzer Systems (BD  
146 Biosciences) for counts of phytoplankton and total cell counts and an easyCyte HT Guava flow  
147 cytometer (Merck Millipore) for total cell counts (see Supplementary method information for  
148 details).

149

#### 150 *Pigment analysis*

151 Phytoplankton community structure was identified by pigment analysis. Four to eleven L  
152 seawater were filtered on Glass fiber filters (25 mm GF/F, Whatman, nominal pore size 0.7µm).  
153 Filters were dried by placing their underside on a kimwipe, transferred to cryovials, stored in  
154 liquid nitrogen until arrival at the laboratory, and kept at -80°C until extraction. The collected  
155 cells were extracted in 1 ml 100% methanol for 2.5 h at room temperature. Extractions were  
156 immediately clarified with syringe filters (Acrodisc CR, 13 mm, 0.2 µm PTFE membranes, Pall  
157 Life Sciences) and transferred to UPLC vials. Samples were run on an UPLC and pigments  
158 identified based on retention time and spectrum absorbance. Several known standards (DHI  
159 Water and Environment Institute, (Hørsholm, Denmark)) were used to ease identification and  
160 calculate pigment concentrations (see Supplementary Information for details).

161

162 *DNA and RNA sample collection and extraction*

163 Seawater was collected from the Niskin bottles into 10 or 20 L polycarbonate carboys. Tubes for  
164 water transfer and the carboys were pre-rinsed three times with sample water. Samples for DNA  
165 (5 to 11.5 L) were pre-filtered through 11 and 5 µm nylon filters (Millipore), cells collected on  
166 0.22 µm sterivex filters (Millipore) and kept in storage buffer (40 mM EDTA, 50 mM Tris pH  
167 8.3, 0.75 M sucrose). Samples for RNA (0.5 to 4.5 L, according to volume filtered within 15  
168 minutes from Niskin bottles being on-deck) were collected without pre-filtration, directly on 0.2  
169 µm filters (Supor-200 Membrane Disc Filters, 25 mm; Pall Corporation) and filters preserved in  
170 RNA Save (Biological Industries). DNA and RNA samples were stored in liquid nitrogen  
171 onboard and kept at -80°C in the lab until extraction. Nucleic acids were extracted at the BioRap  
172 unit, Faculty of Medicine, Technion, Israel using a semi-automated protocol, which includes  
173 manually performed chemical and mechanical cell lysis before the automated steps (see  
174 Supplementary Information for details).

175

176 *PCR amplification and sequencing of 16S rRNA genes (DNA) and transcripts (RNA) samples*

177 Prior to reverse transcription, all RNA samples were tested by PCR for the presence of  
178 contaminating DNA. Total RNA was reverse transcribed using the iScript cDNA synthesis kit  
179 (BioRad) according to the manufacturer's instructions. A two-stage “targeted amplicon  
180 sequencing” protocol (e.g. (Green et al. 2015)) was performed to PCR amplify the 16S rRNA  
181 gene from cDNA and DNA (see Supplementary Information for a detailed description). The  
182 primers used in the first PCR stage consisted of the 16S primer set 515F-Y and 926R (Parada et  
183 al. 2016) that targets the variable V4-5 region with common sequence tags added at the 5’ end as



184 described previously (*e.g.* (Moonsamy et al. 2013)). The first PCR stage was performed in  
185 triplicates, which were pooled after validation on 1% agarose gels. Subsequently, a second PCR  
186 amplification was performed to prepare libraries. These were pooled and after a quality control  
187 sequenced (2x250 paired end reads) using an Illumina MiSeq sequencer. Library preparation and  
188 pooling were performed at the DNA Services (DNAS) facility, Research Resources Center  
189 (RRC), University of Illinois at Chicago (UIC). MiSeq sequencing was performed at the W.M.  
190 Keck Center for Comparative and Functional Genomics at the University of Illinois at Urbana-  
191 Champaign (UIUC).

192

### 193 *Sequence processing*

194 After quality control of the obtained pair of fastq files for each sample, the paired reads were  
195 assembled and additional QC steps taken with MOTHUR Version 1.40.2 (Schloss et al. 2009)  
196 (see Supplementary Information for details). The filtered dataset was clustered into operational  
197 taxonomic units (OTUs) at 97% similarity using QIIME. Representative sequences for each  
198 OTU were obtained and classified using MOTHUR with the silva v128 database at 80%  
199 confidence level. OTUs identified as non-prokaryotic, chloroplasts- or mitochondria-origin and  
200 OTUs with <10 reads across all samples were removed. OTUs identified as SAR11 were also  
201 classified against Silva v132 to get clade assignment. In total, the 56 samples had 2,820,858  
202 quality sequences, which binned into 9448 OTUs. In order to avoid bias related to differences in  
203 library size, all libraries were rarified to 20,000 reads per sample using the R package Vegan  
204 (Oksanen et al. 2017). 9396 OTUs based on 97% similarity were retained after subsampling. Of  
205 these, 8372 OTUs were found in DNA samples with 1538 to 2253 OTUs present per sample and  
206 8684 OTUs in RNA samples ranging from 1604 to 2230 OTUs per sample. Read data were

207 deposited in the NCBI SRA database under the project number PRJNA548664. Station 4 data are  
208 labeled N1200, a change made to ease reading of the article.

209

### 210 *Sequencing controls and variance among replicates*

211 Four negative controls from the first PCR were added randomly onto the sequencing plates to  
212 monitor overall potential for cross contaminations in both PCR and sequencing. These negative  
213 control samples averaged 929 reads, compared to samples averaging 50,503 reads. Accordingly,  
214 contaminant DNA should poorly compete with sample DNA for amplification.

215 To assess within station variability and robustness of the observed trends, duplicates for DNA  
216 and RNA samples were collected and extracted for samples from station 4 for the summer 2015  
217 cruise, the spring 2015 and 2016 cruises, as well as for station 1 for the spring 2016 cruise. We  
218 chose these samples to have a representation from different seasons, as well as from the most  
219 coastal and most offshore stations. Based on their Bray-Curtis dissimilarity, replicates were  
220 significant closer to each other than to other stations from the same cruise (paired Wilcoxon  
221 signed-rank test, RNA:  $z=3.4044$  and  $P<0.001$ ; DNA:  $z=4.2812$  and  $P<0.001$ ).

222

### 223 *Microbial community analyses*

224 Alpha diversity parameters (Chao1 richness, Shannon H' diversity and Simpson index of  
225 dominance) were calculated using the R package iNEXT (Chao et al. 2014; Hsieh et al. 2018).  
226 Beta-diversity was estimated by pairwise calculation of the Bray-Curtis dissimilarity with the R  
227 package Vegan and used for non-metric multidimensional scaling analysis. Vegan was also used  
228 to examine significance of grouping factors (such as molecule type, season and sampling station)  
229 with the ADONIS test and to examine correspondence between abiotic and biotic measurements

230 and variation in community composition by variation partitioning analysis and canonical  
231 correspondence analysis, for which proposed explanatory variables were divided into three  
232 matrices: I) Physical: distance from shore, temperature, salinity, turbidity; II) Nutrients:  
233 phosphate, nitrate+nitrite, silicate; III) Biological: total fluorescence, total cell counts,  
234 *Prochlorococcus* cell counts, *Synechococcus* cell counts (see Supplementary method information  
235 for details of all Vegan analyses).

236 For differential OTU abundance analysis between sample groups (*e.g.* molecule type, season,  
237 sampling station), OTU count data was normalized using the cumulative sum scaling method  
238 implemented in the R package metagenomeSeq (Paulson et al. 2013) and analyzed with the R  
239 package DEseq2 (Love et al. 2014). Significant differential OTU abundance was based on  
240 Benjamini-Hochberg adjusted *P*-values.

241 Synchronous dynamics of single OTUs were analyzed by soft clustering with the R package  
242 Mfuzz (Kumar and Futschik 2007) using OTUs that comprised more than 0.1% of total reads of  
243 DNA and RNA samples, respectively. OTU tables were standardized using the normal SD based  
244 method, fuzzifier variables were estimated (DNA: 1.19569, RNA: 1.182411) and cluster number  
245 was set to 10. Only OTUs with cluster membership values of at least 0.7 were considered.

246 Similarity profile analysis (SIMPROF) (Clarke et al. 2008) based on Bray-Curtis similarity was  
247 run in R using the clustsig package version 1.1 to test for structure in the spring 2016 samples  
248 relating to the intrusion of coastal waters into offshore waters.

249

#### 250 *Statistical analyses*

251 Paired Wilcoxon signed rank tests were performed to test if Bray-Curtis dissimilarity between  
252 replicates from the same sample location was lower than between samples from different

253 locations from the same cruise. A Kruskal-Wallis test was used to find significant difference in  
254 alpha diversity indices between seasons. Two-tailed Mann-Whitney U tests were used to  
255 determine for each season if Bray-Curtis dissimilarity between station 1 and the other three  
256 station was higher than between the three further offshore station. Finally, Spearman correlations  
257 were performed to compare the relative abundance in RNA and flow cytometry data for  
258 *Synechococcus* and *Prochlorococcus*, to compare if distance between stations correlates with  
259 Bray-Curtis dissimilarity between samples and to compare if differences in relative abundance in  
260 RNA and DNA data are correlated. All these tests were performed in PAST version 3.14  
261 (Hammer et al. 2001). Other statistical tests were performed as described above and  
262 implemented in the used R packages.

263

## 264 **Results**

### 265 *Environmental setting*

266 The previously reported ultraoligotrophic status of the Levantine basin (Krom et al. 2005) was  
267 reflected in our nutrient data of samples collected at 10 m (Supplementary Table S3 and S4).  
268 Phosphate concentrations obtained from frozen samples were near or below our detection limit  
269 of 40 nM in all cruises with a maximum of 70 nM at station 1 in early winter 2014.  
270 Nitrate+nitrite concentrations for these samples ranged from < 50 nM to 240 nM at the most  
271 offshore station and from <50 to 690 nM at the most coastal station. They were below our  
272 detection limit (50 nM) for frozen samples during summer cruises apart from station 1 in the July  
273 2015 cruise (120 nM). In early winter they decreased from station 1 towards the offshore  
274 stations, whereas in spring they increased from station 1 to station 3 before decreasing again  
275 towards station 4, the most offshore station. In the summer 2016 cruise, we performed also an

276 analysis on fresh (unfrozen) samples that provided a lower limit of detection (Krom et al. 2005).  
277 This enabled the identification of the nutrient range during the most nutrient depleted state.  
278 Concentrations of phosphate ranged from 0.2 to 2.1 nM, of nitrate from 8 to 28 nM, and of  
279 ammonia from 1.3 to 7 nM (Supplementary Table S4) again confirming the nutrient depleted  
280 status of the Levantine Basin during summer.  
281 Temperature and salinity varied seasonally at the sampling depth (10 m). The lowest  
282 temperatures were observed in spring (17.7-18.6°C) and the highest in summer (26.2-28.7°C).  
283 Seasonal changes in salinity were small (<0.7 PSU from lowest to highest value) (Supplementary  
284 Table S2).  
285 Together CTD (Supplementary Figure 1), nutrient (Supplementary Table S3) and satellite data  
286 (Figure 1) indicated that our sampling times corresponded to three distinct stages of the annual  
287 cycle: the stratified water column in summer, early mixing and phytoplankton bloom in early  
288 winter and the declining phytoplankton bloom in spring (Krom et al. 1992; Kress and Herut  
289 2001). Satellite data indicated the peak of the phytoplankton bloom to be in both years in  
290 February (data not shown). Based on pigment data, early winter samples were dominated by  
291 haptophytes of either Phaeocystaceae or of members of the Prymnesiaceae and Isochrysidaceae  
292 families (see details on pigment results in Supplementary information as well as Supplementary  
293 Figure S2 and Supplementary Table S5). Spring samples were characterized by declining  
294 phytoplankton bloom communities (Supplementary Figure S2, Supplementary Table S5) and  
295 peak abundances of *Prochlorococcus* (Supplementary Figure S5B and Table S6). During  
296 summer the water column was stratified with a mixed layer depth of 30m and characterized by  
297 nutrient depleted surface waters (Supplementary Table S2) and the lowest *Synechococcus*  
298 abundances at stations 2 to 4 (Supplementary Figure S5A, Supplementary Table S6).

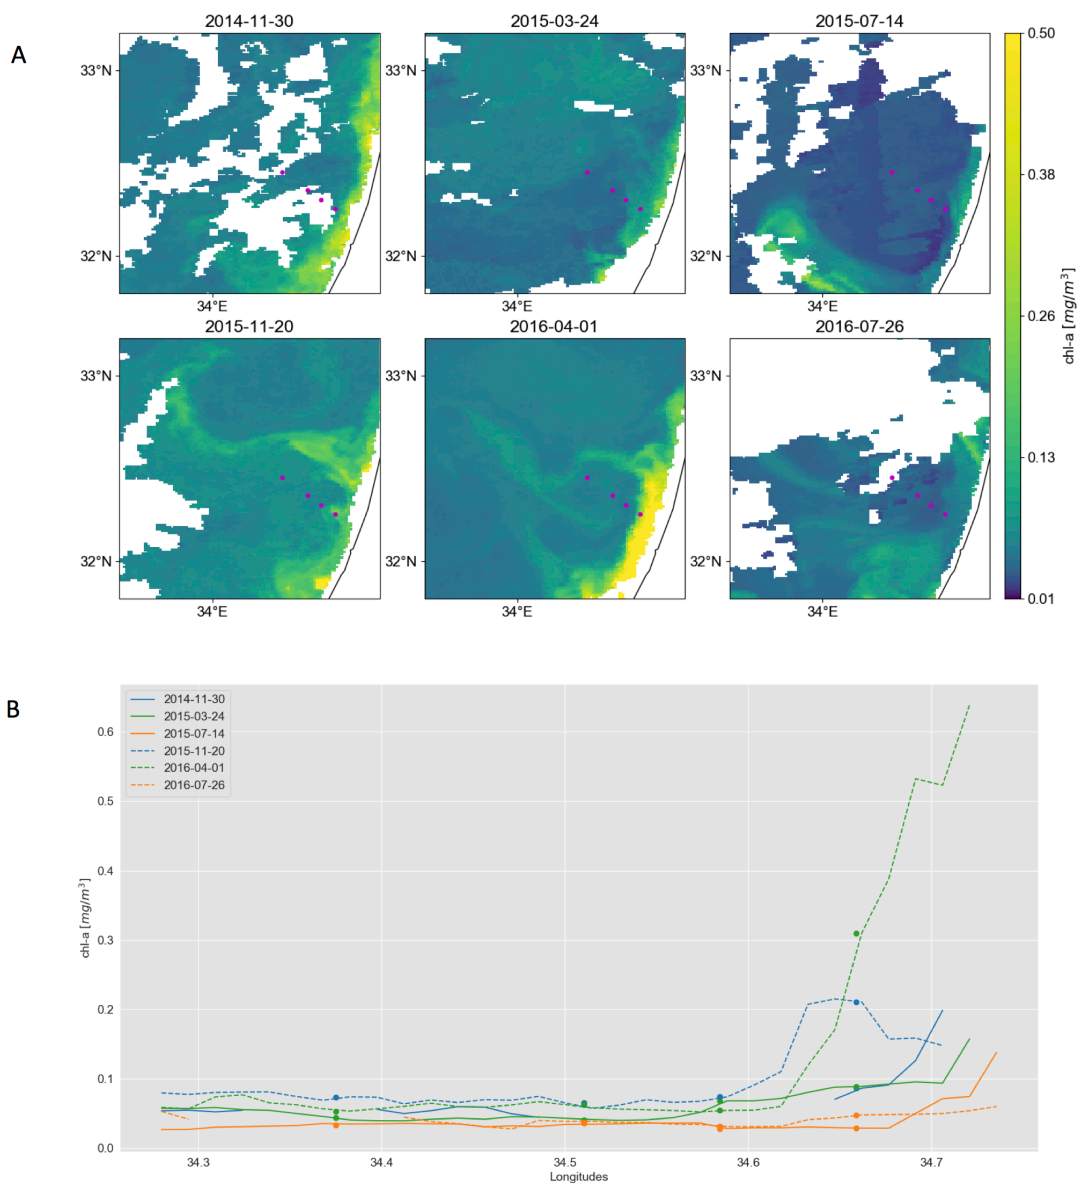

299

300 **Figure 1.** Surface chlorophyll concentrations in the southeastern Mediterranean. Dots mark  
301 locations of sampling stations, which are from right (coast) to left offshore: St1, St2, St3, St4.

302 A) Maps derived from Copernicus Marine Environment Monitoring Service (CMEMS)  
303 merged satellite data. To reduce the area masked by clouds (white color), chlorophyll maps from  
304 30.11.2014, 20.11.2015, 01.04.2016 and 26.07.2016 were used instead of 01.12.2014,  
305 17.11.2015, 30.03.2016 and 25.07.2016, respectively. Furthermore, maps for 30.11.2014,

306 24.3.2015, 14.7.2015 and 26.7.2016 are composed of 5, 3, 3 and 3 consecutive images,  
307 respectively. Purple dots mark the locations of sampling stations.

308 B) Surface chlorophyll concentrations along a coast-to-open-sea transect overlapping the  
309 sampling stations. The transects are derived from the multi-satellite chlorophyll maps shown in  
310 A, with each line corresponding to a different sampling date.

311  
312 When comparing the transect sampling stations from the coast outwards, a clear difference was  
313 seen between station 1, the shallowest and most coastal sampling site, and the other three more  
314 offshore stations. Station 1 often differed from all other sampled stations in nutrient  
315 concentrations (*e.g.* silicate (in spring) and nitrite+nitrate (early winter, Supplementary Tables S2  
316 and S3)), in remotely sensed surface chlorophyll (Figure 1) and several *in situ* parameters such as  
317 temperature (in early winter and spring), salinity (in summer), fluorescence (in early winter) and  
318 turbidity (in early winter and summer, Supplementary Table S5, Supplementary Figure S1). In  
319 accordance with (Berman et al. 1986), it was thus regarded as a coastal station.

320

### 321 *Microbial community composition*

322 93 of the 9396 OTUs (based on 97% similarity) formed the “core” of the microbial community  
323 and were present in all samples and represented 61% of the total reads. Bacteria dominated with  
324 99.68% of the total reads compared to 0.32% of reads identified as archaea. 95.3% of all reads  
325 belonged to nine bacterial classes: Alphaproteobacteria (48.2% of all reads), Cyanobacteria  
326 (17.6%), Gammaproteobacteria (15.4%), Flavobacteriia (5.4%), Marinimicrobia (SAR406 clade)  
327 (2.4%), the Verrucomicrobia class Opitutae (2.1%), Deltaproteobacteria (1.6%), Acidimicrobiia  
328 (1.3%) and Betaproteobacteria (1.3%). Most Alphaproteobacteria reads belonged to the SAR11



329 clade (60.4% of the Alphaproteobacteria), most reads of the class Cyanobacteria were identified  
 330 as either *Prochlorococcus* or *Synechococcus* (together 85.9% of the Cyanobacteria), and the  
 331 SAR86 clade was most common within the Gammaproteobacteria (32.8% of the  
 332 Gammaproteobacteria). Relative abundances of the 13 families with >1% of total reads are  
 333 shown in Figure 2.

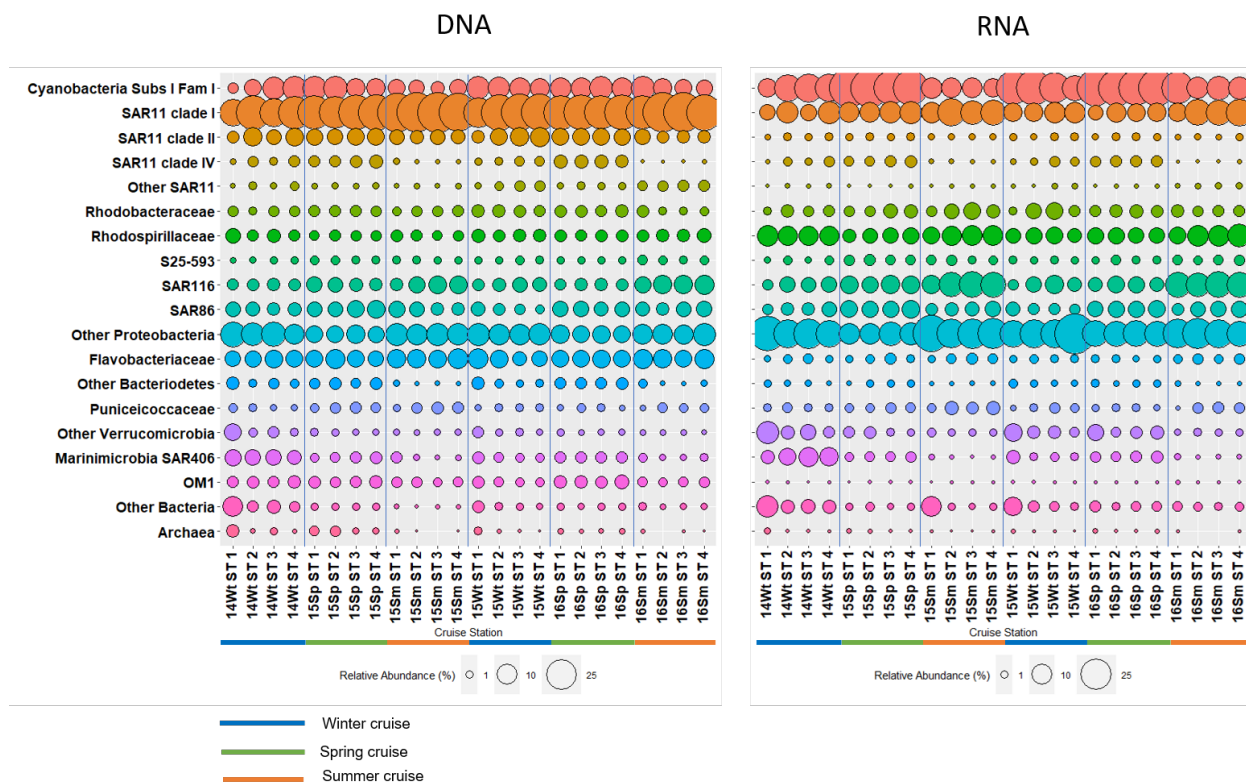

334  
 335 **Figure 2.** Relative abundance of microbial taxa in DNA (left) and RNA (right) samples. Families  
 336 with > 1% total reads (DNA+RNA) are shown. Families below this threshold are summarized at  
 337 the phylum level, except SAR11, which are summarized as other SAR11. Phyla with < 1% of  
 338 total reads are summarized at the domain level. Color bars under the graphs indicate seasons:  
 339 winter- blue, spring – green, summer – orange. Sample code: Last two digits of collection year  
 340 (20XX), season (Wt – early winter, Sp - spring, Sm - summer) and station. Blue vertical lines  
 341 separate different cruises.



342  
343 A significant positive correlation (Spearman correlation,  $r > 0$ ,  $P < 0.05$ ) between relative  
344 abundance in DNA and RNA samples was present in 10 of these 13 families (Supplementary  
345 Table S7) indicating a strong link between presence and activity. However, the composition of  
346 resident (DNA) and active (RNA) microbial communities clearly differed (Figure 2) as  
347 supported by non-metric multidimensional scaling analysis (NMDS) (Figure 3) and Adonis test  
348 ( $F = 22.37$ ,  $R^2 = 0.293$ ,  $P < 0.001$ ). DEseq2 analysis identified 976 OTUs (representing 74.5% of all  
349 reads) with significantly different relative abundances between DNA and RNA (Benjamini-  
350 Hochberg adjusted  $P < 0.05$ ). Of these, 586 OTUs were more abundant in RNA samples and 390  
351 in DNA samples. All significant OTUs from SAR11 clade I, clade II, the OM1 clade and the  
352 Flavobacteriaceae were higher in the DNA than the RNA samples. Significant OTUs of the  
353 Rhodobacteraceae, the SAR86 clade, the SAR116 and the Cyanobacteria subsection I family I,  
354 which included *Cyanobium*, *Synechococcus*, *Prochlorococcus* and OTUs unclassified at the  
355 genus level, were all higher in the RNA than in the DNA samples. Rhodospirillaceae and  
356 Marinimicrobia had both more OTUs with higher relative abundances in RNA than in DNA  
357 samples, however a few OTUs from both groups also showed the opposite trend. The remaining  
358 309 significant OTUs did not sum up to  $> 1\%$  of total reads in any family. Given the difference  
359 between DNA and RNA samples, all subsequent analyses of microbial community composition  
360 (DNA) and activity (RNA) were performed separately.

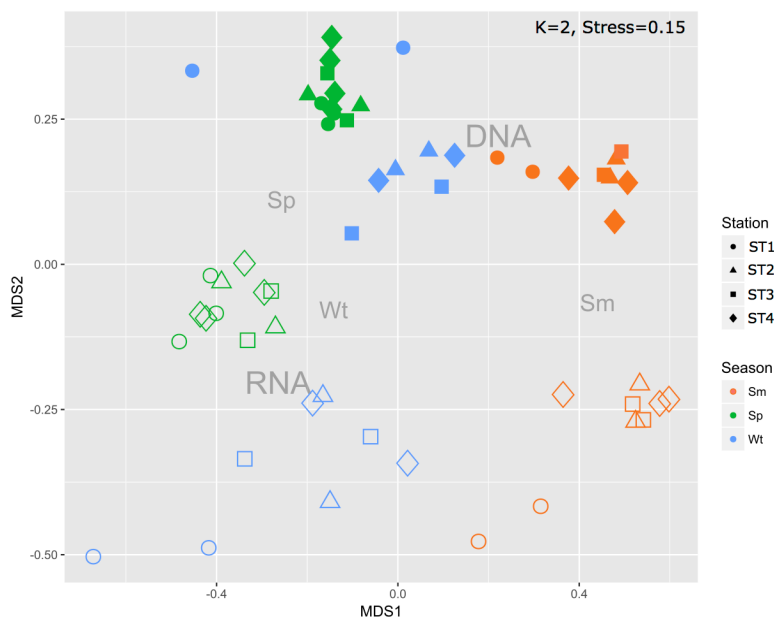

361  
362 **Figure 3.** NMDS plot of the RNA (empty shapes) and DNA (filled shapes) samples. Colors  
363 represent seasons: Spring – green, Summer – red, early Winter – blue.  
364  
365 *Season had a larger effect on microbial structure and activity than spatial location*  
366 Season clearly affected both the microbial community structure (DNA) and activity (RNA)  
367 (Figure 3). This seasonal effect was much larger than the effect of station location across the  
368 coastal to offshore transect (DNA season  $R^2=0.4980$ , station  $R^2=0.0584$ ; RNA season  
369  $R^2=0.5332$ , station  $R^2=0.0607$ ) with a small, significant interaction between season and station  
370 (DNA:  $R^2=0.0840$ ; RNA:  $R^2=0.0806$ ) (Adonis test, details in Supplementary Table S8).  
371 Season affected also the microbial diversity. For DNA samples the three alpha diversity indices  
372 indicated lowest diversity in summer (Kruskal-Wallis test,  $P<0.001$ ), when the system was most  
373 oligotrophic. The same pattern was observed for RNA samples, except for one index (Simpson  
374 diversity) that showed lowest diversity in spring (Supplementary Figure S3).  
375 Soft clustering analysis on abundant OTUs was performed to identify OTUs that show the same  
376 abundance pattern across different seasons. Considering only OTUs with more than 0.1% of total

377 reads, 98 of 110 OTUs at the DNA level, and 115 of 131 OTUs at the RNA level, were  
378 successfully clustered. At both the DNA and RNA level 8 of 10 clusters showed seasonal  
379 preferences (Figure 4). The OTUs of these seasonal clusters contributed 63.9% and 65.0% of  
380 total DNA and RNA reads, respectively. OTUs present in both clustering analyses showed  
381 consistent seasonal preferences (Supplementary Table S9). No OTU was assigned to more than  
382 one cluster. Cluster assignment, taxonomic identity and individual preferences of OTUs as well  
383 as abundance patterns of the non-seasonal clusters are shown in Supplementary File S1.  
384 DEseq2 analysis further confirmed that many OTUs differed significantly between at least two  
385 seasons. 582 OTUs representing 71.3% of all reads at the DNA level and 947 OTUs representing  
386 81% of all reads at the RNA level had significant differences between two seasons (Benjamini-  
387 Hochberg adjusted  $P$ -value  $<0.05$ ). Differences, in terms of relative abundance and number of  
388 significantly differing OTUs, were largest when comparing summer with the other two seasons  
389 (Supplementary File S2).

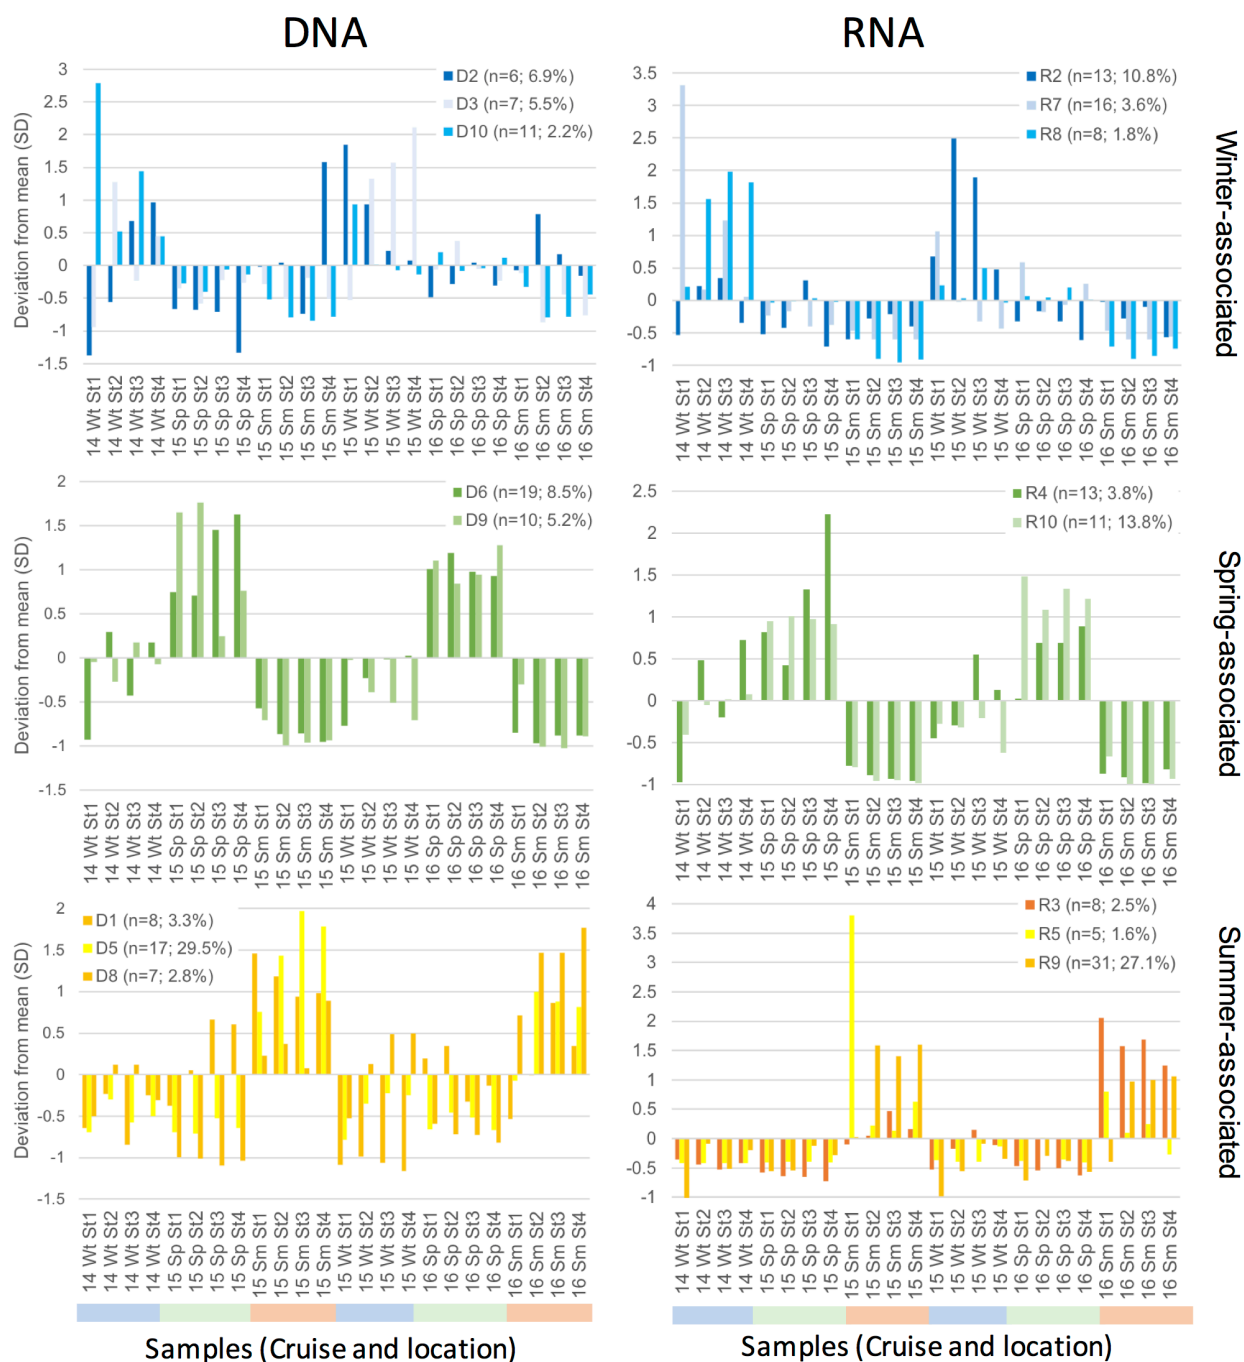

390

391 **Figure 4.** Seasonal patterns of OTUs with >0.1% of total reads in DNA and RNA based on soft  
 392 cluster analysis. Numbers in brackets indicate number of OTUs in the cluster and the sum of  
 393 their relative abundance in total DNA and RNA reads, respectively. Average relative abundance  
 394 was set to 0 and y axis depicts change in abundance in standard deviations. X axis give samples

395 sorted by cruise and location. Sample code consists of last two digits of collection year, season  
396 and station (St1 most coastal, St4 most offshore). Supplementary File S1 shows the patterns of  
397 the non-seasonal clusters D4, D7, R1 and R6 and data of OTUs that did not cluster.  
398  
399 DEseq2 and soft clustering results identified several taxonomic groups favoring specific seasons:  
400 *e.g.* the Chloroflexi clade SAR202, the Marinimicrobia clade SAR406 and the  
401 Deltaproteobacteria clade SAR324 were more abundant in early winter, while the Aegan-169  
402 marine group of the Alphaproteobacteria family Rhodospirillaceae were more abundant in  
403 summer. Lower species richness in summer, as indicated by lower Chao1 indices, was already  
404 evident at the order level (Supplementary Figure S3C). The majority of orders had no OTU that  
405 preferred summer over either spring or winter (Supplementary File S2).  
406 At the DNA level, SAR11 was the order most affected by season, with seasonal preference  
407 varying according to SAR11 clade (Supplementary Figure 4). SAR11 clade Ia was the main  
408 SAR11 clade (51.4- 80.3% of all SAR11 DNA reads) and the most abundant taxonomic group  
409 overall (15.7-40.8% of the DNA reads). Its highest abundances were observed in summer.  
410 Cluster analysis grouped its four most abundant OTUs (contributing 0.5 to 20.7% of total DNA  
411 reads) with summer-associated clusters, while the other clustered OTUs were assigned to a  
412 spring-associated cluster (Supplementary File 1). SAR11 clade Ia was the only SAR11 clade  
413 with summer associated OTUs in the cluster analysis apart from SAR11 clade III, which had one  
414 OTU but overall did not show a clear seasonal pattern. SAR11 clades Ib, II and IV had their  
415 lowest relative abundances in summer. SAR11 clade II peaked in spring and early winter, while  
416 clade IV was most abundant in spring (Supplementary Figure S4 B). Overall, few SAR11 OTUs

417 differed significantly between winter and spring with all but one clade III OTU preferring spring  
418 (Supplementary file 2).

419 At the RNA level, cyanobacteria subsection I was the order that was mostly affected by season.  
420 All significant OTUs in the DEseq2 analysis (Benjamini-Hochberg adjusted  $P$ -value  $< 0.05$ )  
421 (125 OTUs, 22.6% of all RNA reads) belonged to family I, with most (83) being taxonomically  
422 assigned to *Prochlorococcus*. The vast majority of significant OTUs (109 OTUs) were  
423 significantly more active in spring than summer and 47 were significantly more active in early  
424 winter than summer. 43 OTUs differed significantly between spring and early winter (34 more  
425 active in spring, 9 in early winter). The few OTUs that were significantly more active in summer  
426 were all very rare. Overall cyanobacteria subsection I represented a larger part of the active  
427 community in spring (35.8% average of RNA reads), followed by winter (22.4%) and summer  
428 (12.9%) (Figure 2 B). *Prochlorococcus* made up for a larger part of the active community in  
429 spring, whereas no clear preference between winter and spring was observed for *Synechococcus*.  
430 Their activity pattern correlated well with their cell abundances as determined by flow cytometry  
431 (Spearman  $r_s$  0.75 and 0.62, both  $p < 0.001$  for *Prochlorococcus* and *Synechococcus*, respectively)  
432 (Supplementary Figure S5).

433 Other taxonomic groups had closely related OTUs with different seasonal preferences. Details on  
434 their seasonal preferences are given in Supplementary Files S1 and S2, that show the cluster-  
435 based preferences of all abundant ( $>0.1$  % of reads) OTUs at DNA and RNA levels and all OTUs  
436 with significant seasonal difference according to DEseq2 analysis (Benjamini-Hochberg adjusted  
437  $P$ -value  $< 0.05$ ), respectively.

438

439 *Spatial effects: Microbial communities at coastal station 1 differ from those at offshore stations*  
440 *in summer and early winter, but not in spring.*

441 Sampling site had a weak, yet significant effect on microbial structure and activity and interacted  
442 with season (Adonis test, see Supplementary Table S8 for details). However, no significant  
443 correlation was found between distance between stations and Bray-Curtis dissimilarity in  
444 microbial community structure (DNA) or activity (RNA) (Spearman correlation,  $P>0.05$ )  
445 irrespective if the whole data set was analyzed or each season separately. Further, when testing  
446 which environmental factors affected microbial community structure, distance between station  
447 was not a significant factor in the DNA analysis (canonical correspondence analysis (CCA),  
448  $P>0.05$ , Supplementary Figure S7). In the RNA analysis distance was a significant factor in the  
449 CCA, but it was no longer significant when correcting for variance explained by the biological  
450 and nutrient data matrices (conditional CCA,  $P>0.05$ , Supplementary Figure S7).

451 As station 1 differed in environmental parameters from the three more offshore stations (see  
452 environmental settings above), we tested if this difference could be detected in the microbial  
453 community structure (DNA) and activity (RNA). Bray-Curtis dissimilarities were significantly  
454 higher between station 1 and the other three stations than among the three offshore stations, in  
455 both early winter and summer (Mann-Whitney U test, 2-tailed, winter: RNA  $z=-2.3219$   $P=0.020$ ;  
456 DNA:  $z=-2.8022$   $P=0.005$ ; summer: RNA  $z=-3.1825$   $P=0.001$ ; DNA:  $z=-2.8353$   $P=0.005$ ), but  
457 not in spring (RNA:  $z=-0.2967$   $P=0.767$ ; DNA:  $z=-1.2858$   $P=0.199$ ) (Figure 5). The effect was  
458 also observed in the NMDS plot as summer and early winter samples from station 1 grouped  
459 apart from the samples of stations 2 to 4 (Figure 3).

460

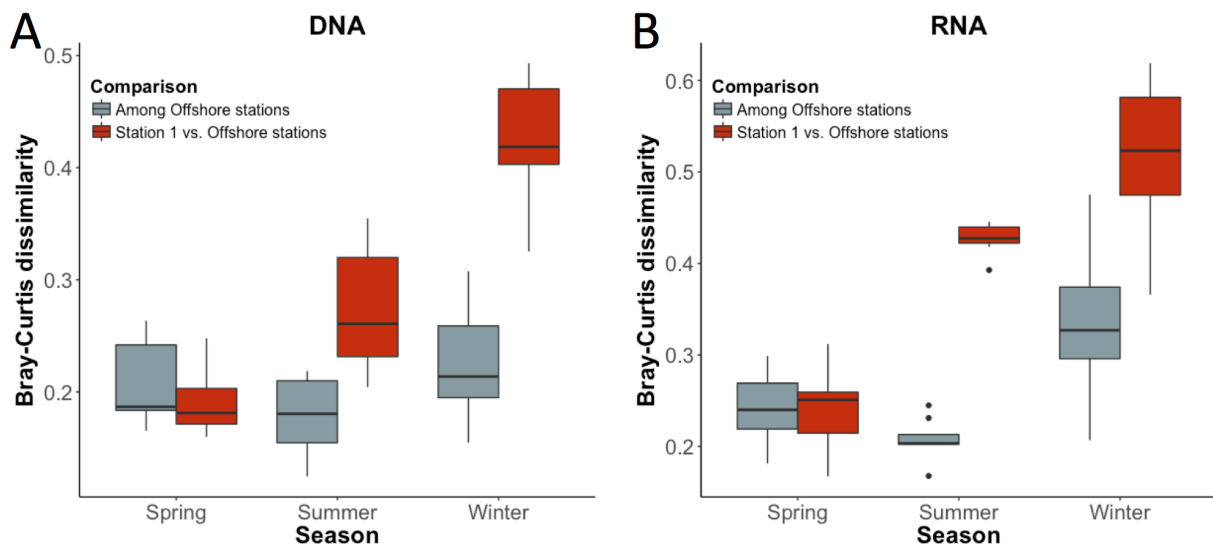

461

462 **Figure 5.** Bray-Curtis dissimilarity of A) DNA and B) RNA samples. Comparisons involving

463 station 1 differ significantly from comparisons among stations 2, 3 and 4 in summer and early

464 winter in both RNA and DNA samples

465

466 In summer, 22 OTUs (5.7% of all summer reads) and 27 OTUs (8.5% of all summer reads) at the

467 DNA and RNA level, respectively, differed significantly between station 1 and stations 2-4

468 (DEseq2 analysis, Benjamini-Hochberg adjusted  $P$ -value < 0.05). In early winter 54 OTUs (5.0%

469 of all early winter reads) and 76 OTUs (11.8% of all early winter reads) at the DNA and RNA

470 level respectively, differed significantly between the coastal station and the offshore stations

471 (DEseq2 analysis, Benjamini-Hochberg adjusted  $P$ -value < 0.05). 5 OTUs at the DNA level and

472 2 OTUs at the RNA differed significantly between station 1 and stations 2-4 in both summer and

473 winter. Their preference was the same in both seasons suggesting a general preference for coastal

474 or offshore conditions. Supplementary File S3 provides information on the taxonomy of groups

475 enriched at station 1 or at the offshore stations 2-4.

476



477 *Offshore microbial communities are affected by intrusions of coastal water*

478 At sites close to the Israeli coast of the EMS, short-term natural pulses of nutrients in the ultra-  
479 oligotrophic offshore waters can occur due to intrusions of mesoscale patches of coastal water  
480 that can be frequently observed by analysis of satellite-derived surface chlorophyll data (Efrati et  
481 al. 2013; Dubinsky et al. 2017). These intrusions of coastal water lead to shifts in the microbial  
482 communities of offshore affected sites (Dubinsky et al. 2017). Satellite chlorophyll (Figure 1) as  
483 well as *in situ* data (Supplementary Table S5) indicated an intrusion of coastal water into  
484 offshore waters taking place during the spring 2016 cruise, that affected station 4. As a result,  
485 phytoplankton community structure changed, as evidenced by increased concentrations in  
486 several pigments (Supplementary Table S4) and slightly higher abundances in *Synechococcus*  
487 cell numbers at the coastal station 1 and the intrusion-affected offshore station 4 compared to the  
488 offshore non-affected stations 2 and 3 (Supplementary Table S6). The affected stations grouped  
489 together in hierarchical clustering of the microbial structure (DNA) and activity (RNA)  
490 (Supplementary Figure S6), but DEseq2 analysis failed to identify any OTUs responsible for this  
491 difference (Benjamini-Hochberg adjusted  $P$ -value  $> 0.05$  for all OTUs).

492

493 *Effects of environmental parameters on the microbial community structure and activity*

494 Three data matrixes of external factors were examined for their influence on the microbial  
495 structure and activity: i) physical data (consisting of distance from shore, temperature, salinity  
496 and turbidity), ii) biological data: fluorescence (as proxy for chlorophyll), total cell number,  
497 *Prochlorococcus* counts, *Synechococcus* counts and iii) nutrient data: concentrations of  
498 phosphate, nitrate+nitrite, silicate. Together the three matrixes explained 49% of the observed  
499 variability of the microbial structure (DNA samples) and 72% of the microbial activity (RNA

500 samples). Partition analysis indicated that in both analyses, the physical data matrix explained  
501 most of the variability (34.2% and 54.2% for DNA and RNA, respectively), followed by the  
502 biological data matrix (29.2% and 45.1% for DNA and RNA, respectively) and the nutrient data  
503 matrix (11.8% and 10.3% for DNA and RNA, respectively). The physical data matrix also had  
504 the largest proportion of variability not explained by any of the other two matrixes  
505 (Supplementary Figure S7).

506 A CCA analysis was performed to identify the environmental factors likely responsible for the  
507 observed patterns. Similar to the partition analysis, the physical matrix explained the largest  
508 amount of variance, followed by the biological matrix and the nutrient matrix. Temperature and  
509 salinity from the physical matrix and fluorescence from the biological matrix were significant  
510 factors in the DNA and RNA analysis (both in the unconditioned and conditioned analysis,  
511  $P < 0.05$ , Supplementary Figure S7). In the nutrient matrix, only silicate was consistently  
512 significant, but only in the DNA analysis ( $P < 0.05$ , Supplementary Figure S7).

513

## 514 **Discussion**

515 The ultra-oligotrophic nature of the Eastern Mediterranean Sea (EMS) is reflected in the  
516 microbial community structure of this coastal-offshore transect. Typical oligotrophic groups (*e.g.*  
517 SAR11) dominated throughout the year confirming previous snapshot studies of the EMS  
518 (Feingersch et al. 2010; Dubinsky et al. 2017). The microbial communities resembled closely  
519 those found at ultra-oligotrophic open ocean stations, both at the coastal station (*e.g.* SAR11  
520 ranging from  $26 \pm 4$  % in winter to  $44 \pm 6$  % in summer) and even more at the offshore stations  
521 (*e.g.* SAR11 ranging from  $44 \pm 8$  % in winter to  $47 \pm 5$  % in summer). These estimates are  
522 similar if not higher than those found at oligotrophic ocean gyres such as the South Atlantic gyre

523 (36 ± 9%) (Morris et al. 2012), the North Pacific gyre (ALOHA station, 44% in winter, 33% in  
524 summer) (Eiler et al. 2009), the South Pacific gyre (up to 53% in the most oligotrophic station)  
525 (West et al. 2016) and the Sargasso sea (North Atlantic gyre, BATS station, 33 ± 8%) (Carlson et  
526 al. 2009). Powley et al. (Powley et al. 2017) recently proposed that the EMS behaves similar to  
527 open gyres with respect to the importance of external nutrient supply, of dissolved organic matter  
528 as a key source of nutrients and ultra-oligotrophic conditions. Here we show that this is true also  
529 in terms of microbial community composition. The dominance of microbial groups typically  
530 considered to be oligotrophic at the coastal station (station 1) during spring and summer  
531 underlines that in the EMS oligotrophic conditions are found also close to the coast. SAR11  
532 relative abundances were in fact much higher (>40% of DNA reads in both spring and summer)  
533 than those found at coastal stations in other parts of the Mediterranean Sea, including the North  
534 Western Mediterranean and the Adriatic Sea (Alonso-Sáez et al. 2007; Quero and Luna 2014;  
535 Tinta et al. 2015), highlighting the overall more oligotrophic status of the South Eastern  
536 Levantine basin.

537 In our study, season affected the microbial community structure and activity much more than  
538 spatial location along the coastal to offshore transect. This finding differs from other studies that  
539 analyzed spatial-temporal community changes in coastal-offshore transects. In a transect that  
540 sampled the Columbia river, its estuary, plume and coastal to offshore lines, Fortunato et al  
541 (Fortunato et al. 2011) described a stable spatial separation between the sampling sites  
542 throughout the year, while seasonal differences were observed only within site-groups. This  
543 could be explained by the salinity gradient along the transect, as indicated by the high correlation  
544 with salinity (Fortunato et al. 2011). However, in absence of particular salinity gradients, also  
545 Wang et al. (Wang et al. 2019) found a strong influence of sample location on microbial

546 community structure when sampling off the coastal PICO station and out to the Sargasso Sea.  
547 Yet, a seasonal effect could be seen there in the clustering of shelf stations, which grouped either  
548 with the coastal station or with the offshore station, depending on season and by the strong  
549 influence of temperature. Key differences between the study by Wang et al. (Wang et al. 2019)  
550 and our study are the strength of the environmental gradient between the coastal and offshore  
551 stations and the overall productivity of the coastal area. The region studied by Wang et al. (Wang  
552 et al. 2019) was characterized by higher productivity and stronger shore influence on the coastal  
553 stations. In the Wang et al. study primary production at the coastal station was usually above  
554  $1000 \text{ mg C m}^{-3} \text{ d}^{-1}$ , which is more than an order of magnitude higher than that of their most  
555 offshore station (Wang et al. 2019). In the EMS, at a coastal site in Israel, Raveh et al. found that  
556 primary production would reach a maximum of about  $270 \text{ mg C m}^{-3} \text{ d}^{-1}$  and the difference  
557 between coastal and offshore sites was only about four-fold (Raveh et al. 2015). Given that this  
558 site was only 50 m from shore with a bottom depth of 5m, we expect the difference in primary  
559 production between our coastal site (16 km from shore with a bottom depth of 100 m) and the  
560 offshore stations to be even lower. The spatial effects on the microbial community between the  
561 most coastal station 1 and the offshore stations 2 to 4 were detected in early winter and summer,  
562 yet not in spring, when coastal and offshore communities were highly similar. This is in line with  
563 earlier observations of the EMS, that based on chlorophyll and temperature, described a distinct  
564 border between coastal and offshore waters from late spring to early winter, while this border  
565 became diffuse from winter to early spring (Berman et al. 1986).  
566 Profound and predictable seasonal shifts in marine surface water microbial communities have  
567 been shown in several studies (*e.g.* (Fuhrman et al. 2006, 2015; Ward et al. 2017; Galand et al.  
568 2018)) and, as in our case, temperature has been frequently identified as a main environmental

569 driver (*e.g.* (Sunagawa et al. 2015; Lucas et al. 2016; Ward et al. 2017)). Salinity, like  
570 temperature, is often an indicator for seasonal changes in hydrography and accordingly it is often  
571 identified as seasonal driver of marine surface water microbial communities (*e.g.* (Fuhrman et al.  
572 2006; Ward et al. 2017)). Despite the fact that seasonality is expected to strongly affect primary  
573 productivity and nutrient availability in the EMS (Kress and Herut 2001; Krom et al. 2014;  
574 Raveh et al. 2015), our measured nutrient data explained the seasonal shifts in microbial  
575 communities to a lesser extent than the measured physical parameters. It is possible that the  
576 effect of nutrients was not detected as several measurements, especially phosphate, were below  
577 the detection limit of our analysis method. Higher sensitivity nutrient measurements using fresh  
578 unfrozen samples (such as those here utilized only in the July 2016 cruise) might clarify the  
579 importance of nutrients *versus* physical factors in the seasonality patterns of the microbial  
580 community. Our measured parameters explained a large part of the observed variability in  
581 microbial community: 49% of the DNA and 72% of the RNA data. Additional factors that were  
582 not measured in this study, may be responsible for the unexplained variability. These include UV  
583 radiation, which is known to penetrate deep into the clear waters of the EMS with UV doses  
584 among the highest of all oceans (Tedetti and Sempéré 2006; Smyth 2011), and irradiance, a  
585 factor known for structuring surface water microbial communities in the subtropical North  
586 Pacific Gyre station ALOHA (Bryant et al. 2016).

587 The recurrent shifts in microbial structure and activity followed established seasonal patterns.  
588 Physical mixing of the water column in early winter seemed to be responsible for a ‘resetting’ of  
589 the microbial ecosystem from a low diversity state in summer, when the microbial community is  
590 nutrient depleted in the EMS community (Thingstad et al. 2005; Tanaka et al. 2011), to a high  
591 diversity state in winter, as previously proposed for the Northwestern Mediterranean Sea (Salter

592 et al. 2015). The mixing leads to an upwelling of nutrients that allow previously rare microbes to  
593 grow and thrive. In addition, microbes from deeper layers are brought up and might repopulate  
594 and grow in the now nutrient enriched surface waters as observed in the Western Mediterranean  
595 Sea (Haro-Moreno et al. 2018). These ‘upwelled’ microbes might interact with surface water  
596 microbes and affect the microbial community as shown in recent mesocosm experiments  
597 performed in the EMS (Hazan et al. 2018). Potential candidates of ‘upwelled’ microbes in our  
598 study include *e.g.* SAR202 and SAR406 groups that are typical of deeper water and were more  
599 abundant in early winter than in spring or summer. In the EMS, phytoplankton is dominated by  
600 nano- to micro sized organisms in winter and picophytoplankton in summer (Raveh et al. 2015).  
601 These differences were reflected in our pigment data. Seasonality in heterotrophic bacteria might  
602 thus be due to changes in phytoplankton composition, which, likely through the different types of  
603 organic carbon produced, are known to affect microbial community structure (Camarena-Gómez  
604 et al. 2018).

605 Annual microbial patterns can be observed also at the level of closely related OTUs within  
606 specific taxonomic groups that have different seasonal preferences, as found both in this study  
607 and at the coastal PICO site (Ward et al. 2017). The seasonal preference is likely due to  
608 differences in their genomic make-up resulting in different ecotypes that thrive under different  
609 environmental conditions. An example is provided by the dominant SAR11 clade, where, within  
610 clade 1a, the three most abundant OTUs peaked in summer, while the fourth to sixth most  
611 abundant ones peaked in spring. Nevertheless, the main seasonal differences in SAR11  
612 abundances were linked to SAR11 clades. They followed the general patterns found at other  
613 ocean stations such as the Mola station in the Northwestern Mediterranean (Salter et al. 2015)  
614 and the BATS station in the Sargasso sea (Carlson et al. 2009; Vergin et al. 2013) with some

615 differences: similarly to Mola and in contrast to BATS, in the EMS clade Ib did not replace clade  
616 Ia as the dominant clade in spring, whereas in contrast to Mola we found in the EMS a  
617 substantial amount of SAR11 clade IV that followed the seasonal pattern described at BATS  
618 (Vergin et al. 2013).

619 Seasonal shifts in microbial communities are linked to functional differences between microbes  
620 that enable better adaptation to the changing environment (Galand et al. 2018; Haro-Moreno et  
621 al. 2018). These changes can have a strong impact on biogeochemical cycles. Here we provide a  
622 detailed analysis of spatial and temporal changes of microbial communities in the South Eastern  
623 Levantine basin. To understand how the observed microbial community shifts affect  
624 biogeochemical cycles will require metagenomic and transcriptomic studies, as well as  
625 ecophysiology investigations of the dominant bacterial groups.

626

## 627 **Acknowledgements**

628 We thank all cruise participants, the crew of the R/V Mediterranean Explorer and the EcoOcean  
629 foundation for their help in sampling, Dr. Rinat Bar Shalom (University of Haifa) for help in  
630 cruise planning and preparation, Dr. Tanya Rivilin (Interuniversity Institute for Marine Science  
631 at Eilat) for help in nutrient analysis and Dr. Stephan Green (DNA Services Facility at University  
632 of Illinois at Chicago) for useful comments and suggestions on the amplicon sequencing  
633 methods. This study was funded by the Israel Science Foundation grant (ISF #1243/16) to LS.  
634 The seasonal cruises were supported by funding from the Leon H. Charney School of Marine  
635 Sciences (Haifa University, Israel). MH was supported by an Inter-Institutional post-doctoral  
636 fellowship from the Haifa University and a Helmsley Trust fellowship.

637

638 **Conflict of interest**

639 The authors declare no conflict of interest.

640

641 **References**

642 Alonso-Sáez, L., V. Balagué, E. L. Sà, and others. 2007. Seasonality in bacterial diversity in

643 north-west Mediterranean coastal waters: assessment through clone libraries,

644 fingerprinting and FISH. *FEMS microbiology ecology* **60**: 98–112. doi:10.1111/j.1574-

645 6941.2006.00276.x

646 Berman, T., Y. Azov, A. Schneller, P. Walline, and D. Townsend. 1986. Extent, transparency

647 and phytoplankton distribution of the neritic waters overlying the Israeli coastal shelf.

648 *Oceanologica Acta* **9**: 439–447.

649 Bryant, J. A., F. O. Aylward, J. M. Eppley, D. M. Karl, M. J. Church, and E. F. DeLong. 2016.

650 Wind and sunlight shape microbial diversity in surface waters of the North Pacific

651 Subtropical Gyre. *The ISME Journal* **10**: 1308–1322. doi:10.1038/ismej.2015.221

652 Camarena-Gómez, M. T., T. Lipsewers, J. Piiparinen, E. Eronen-Rasimus, D. Perez-Quemaliños,

653 L. Hoikkala, C. Sobrino, and K. Spilling. 2018. Shifts in phytoplankton community

654 structure modify bacterial production, abundance and community composition. *Aquatic*

655 *Microbial Ecology* **81**: 149–170. doi:10.3354/ame01868

656 Carlson, C. A., R. Morris, R. Parsons, A. H. Treusch, S. J. Giovannoni, and K. Vergin. 2009.

657 Seasonal dynamics of SAR11 populations in the euphotic and mesopelagic zones of the

658 northwestern Sargasso Sea. *The ISME Journal* **3**: 283–295. doi:10.1038/ismej.2008.117

659 Chao, A., N. J. Gotelli, T. C. Hsieh, E. L. Sander, K. H. Ma, R. K. Colwell, and A. M. Ellison.

660 2014. Rarefaction and extrapolation with Hill numbers: a framework for sampling and



- 661 estimation in species diversity studies. *Ecological Monographs* **84**: 45–67.
- 662 doi:10.1890/13-0133.1
- 663 Clarke, K. R., P. J. Somerfield, and R. N. Gorley. 2008. Testing of null hypotheses in  
664 exploratory community analyses: similarity profiles and biota-environment linkage.  
665 *Journal of Experimental Marine Biology and Ecology* **366**: 56–69.  
666 doi:10.1016/j.jembe.2008.07.009
- 667 D’Alimonte, D., and G. Zibordi. 2003. Phytoplankton determination in an optically complex  
668 coastal region using a multilayer perceptron neural network. *IEEE Transactions on*  
669 *Geoscience and Remote Sensing* **41**: 2861–2868. doi:10.1109/tgrs.2003.817682
- 670 Dubinsky, V., M. Haber, I. Burgsdorf, and others. 2017. Metagenomic analysis reveals unusually  
671 high incidence of proteorhodopsin genes in the ultraoligotrophic Eastern Mediterranean  
672 Sea. *Environmental microbiology* **19**: 1077–1090. doi:10.1111/1462-2920.13624
- 673 Efrati, S., Y. Lehahn, E. Rahav, and others. 2013. Intrusion of coastal waters into the pelagic  
674 eastern Mediterranean: in situ and satellite-based characterization. *Biogeosciences* **10**:  
675 3349–3357. doi:10.5194/bg-10-3349-2013
- 676 Eiler, A., D. H. Hayakawa, M. J. Church, D. M. Karl, and M. S. Rappé. 2009. Dynamics of the  
677 SAR11 bacterioplankton lineage in relation to environmental conditions in the  
678 oligotrophic North Pacific subtropical gyre. *Environmental microbiology* **11**: 2291–2300.  
679 doi:10.1111/j.1462-2920.2009.01954.x
- 680 Falkowski, P. G., T. Fenchel, and E. F. Delong. 2008. The Microbial Engines That Drive Earth’s  
681 Biogeochemical Cycles. *Science* **320**: 1034–1039. doi:10.1126/science.1153213

- 682 Feingersch, R., M. T. Suzuki, M. Shmoish, I. Sharon, G. Sabehi, F. Partensky, and O. Béjà.  
683 2010. Microbial community genomics in eastern Mediterranean Sea surface waters. *The*  
684 *ISME Journal* **4**: 78–87. doi:10.1038/ismej.2009.92
- 685 Fortunato, C. S., L. Herfort, P. Zuber, A. M. Baptista, and B. C. Crump. 2011. Spatial variability  
686 overwhelms seasonal patterns in bacterioplankton communities across a river to ocean  
687 gradient. *The Isme Journal* **6**: 554.
- 688 Fuhrman, J. A., J. A. Cram, and D. M. Needham. 2015. Marine microbial community dynamics  
689 and their ecological interpretation. *Nature reviews. Microbiology* **13**: 133–146.  
690 doi:10.1038/nrmicro3417
- 691 Fuhrman, J. A., I. Hewson, M. S. Schwalbach, J. A. Steele, M. V. Brown, and S. Naeem. 2006.  
692 Annually reoccurring bacterial communities are predictable from ocean conditions.  
693 *Proceedings of the National Academy of Sciences of the United States of America* **103**:  
694 13104–13109. doi:10.1073/pnas.0602399103
- 695 Galand, P. E., O. Pereira, C. Hochart, J. C. Auguet, and D. Debroas. 2018. A strong link between  
696 marine microbial community composition and function challenges the idea of functional  
697 redundancy. *The ISME journal*. doi:10.1038/s41396-018-0158-1
- 698 Ghiglione, J.-F., M. Larcher, and P. Lebaron. 2005. Spatial and temporal scales of variation in  
699 bacterioplankton community structure in the NW Mediterranean Sea. *Aquatic Microbial*  
700 *Ecology* **40**: 229–240.
- 701 Gilbert, J. A., J. A. Steele, J. G. Caporaso, and others. 2012. Defining seasonal marine microbial  
702 community dynamics. *The ISME journal* **6**: 298–308. doi:10.1038/ismej.2011.107
- 703 Giovannoni, S. J., and K. L. Vergin. 2012. Seasonality in ocean microbial communities. *Science*  
704 (New York, N.Y.) **335**: 671–676. doi:10.1126/science.1198078

- 705 Green, S. J., R. Venkatramanan, and A. Naqib. 2015. Deconstructing the Polymerase Chain  
706 Reaction: Understanding and Correcting Bias Associated with Primer Degeneracies and  
707 Primer-Template Mismatches V.M. Ugaz [ed.]. PLOS ONE **10**: e0128122.  
708 doi:10.1371/journal.pone.0128122
- 709 Hammer, O., D. Harper, and P. Ryan. 2001. PAST: Paleontological statistics software package  
710 for education. *Palaeontologia Electronica* **4**: 9pp.
- 711 Haro-Moreno, J. M., M. Lopez-Perez, J. R. de la Torre, A. Picazo, A. Camacho, and F.  
712 Rodriguez-Valera. 2018. Fine metagenomic profile of the Mediterranean stratified and  
713 mixed water columns revealed by assembly and recruitment. *Microbiome* **6**: 128.  
714 doi:10.1186/s40168-018-0513-5
- 715 Hazan, O., J. Silverman, G. Sisma-Ventura, T. Ozer, I. Gertman, E. Shoham-Frider, N. Kress,  
716 and E. Rahav. 2018. Mesopelagic Prokaryotes Alter Surface Phytoplankton Production  
717 during Simulated Deep Mixing Experiments in Eastern Mediterranean Sea Waters. *Front.*  
718 *Mar. Sci.* **5**. doi:10.3389/fmars.2018.00001
- 719 Hsieh, T. C., K. H. Ma, and A. Chao. 2018. iNEXT: iNterpolation and EXTrapolation for species  
720 diversity,.
- 721 Keuter, S., E. Rahav, B. Herut, and B. Rinkevich. 2015. Distribution patterns of bacterioplankton  
722 in the oligotrophic south-eastern Mediterranean Sea. *FEMS Microbiol Ecol* **91**: fiv070.  
723 doi:10.1093/femsec/fiv070
- 724 Kress, N., and B. Herut. 2001. Spatial and seasonal evolution of dissolved oxygen and nutrients  
725 in the Southern Levantine Basin (Eastern Mediterranean Sea): chemical characterization  
726 of the water masses and inferences on the N:P ratios. *Deep Sea Research Part I:*  
727 *Oceanographic Research Papers* **48**: 2347–2372. doi:10.1016/s0967-0637(01)00022-x

- 728 Krom, M. D., S. Brenner, N. Kress, A. Neori, and L. I. Gordon. 1992. Nutrient dynamics and  
729 new production in a warm-core eddy from the Eastern Mediterranean Sea. *Deep Sea*  
730 *Research Part A. Oceanographic Research Papers* **39**: 467–480. doi:10.1016/0198-  
731 0149(92)90083-6
- 732 Krom, M. D., K.-C. Emeis, and P. V. Cappellen. 2010. Why is the Eastern Mediterranean  
733 phosphorus limited? *Progress in Oceanography* **85**: 236–244.  
734 doi:10.1016/j.pocean.2010.03.003
- 735 Krom, M. D., N. Kress, S. Brenner, and L. I. Gordon. 1991. Phosphorus limitation of primary  
736 productivity in the eastern Mediterranean Sea. *Limnology and Oceanography* **36**: 424–  
737 432. doi:10.4319/lo.1991.36.3.0424
- 738 Krom, M. D., E. M. S. Woodward, B. Herut, and others. 2005. Nutrient cycling in the south east  
739 Levantine basin of the eastern Mediterranean: Results from a phosphorus starved system.  
740 *Deep Sea Research Part II: Topical Studies in Oceanography* **52**: 2879–2896.  
741 doi:10.1016/j.dsr2.2005.08.009
- 742 Krom, M., N. Kress, I. Berman-Frank, and E. Rahav. 2014. Past, Present and Future Patterns in  
743 the Nutrient Chemistry of the Eastern Mediterranean. 49–68. doi:10.1007/978-94-007-  
744 6704-1\_4
- 745 Kumar, L., and M. E. Futschik. 2007. Mfuzz: A software package for soft clustering of  
746 microarray data. *Bioinformatics* **2**: 5–7. doi:10.6026/97320630002005
- 747 Lehahn, Y., I. Koren, S. Sharoni, F. d’Ovidio, A. Vardi, and E. Boss. 2017. Dispersion/dilution  
748 enhances phytoplankton blooms in low-nutrient waters. *Nature Communications* **8**:  
749 14868–14868. doi:10.1038/ncomms14868

- 750 Love, M. I., W. Huber, and S. Anders. 2014. Moderated estimation of fold change and dispersion  
751 for RNA-seq data with DESeq2. *Genome biology* **15**: 550. doi:10.1186/s13059-014-  
752 0550-8
- 753 Lucas, J., A. Wichels, and G. Gerdts. 2016. Spatiotemporal variation of the bacterioplankton  
754 community in the German Bight: from estuarine to offshore regions. *Helgoland Marine*  
755 *Research* **70**: 16. doi:10.1186/s10152-016-0464-9
- 756 Man-Aharonovich, D., N. Kress, E. B. Zeev, I. Berman-Frank, and O. Béjà. 2007. Molecular  
757 ecology of nifH genes and transcripts in the eastern Mediterranean Sea. *Environ*  
758 *Microbiol* **9**: 2354–2363. doi:10.1111/j.1462-2920.2007.01353.x
- 759 Moonsamy, P. V., T. Williams, P. Bonella, and others. 2013. High throughput HLA genotyping  
760 using 454 sequencing and the Fluidigm Access Array™ system for simplified amplicon  
761 library preparation: High throughput HLA 454 sequencing using the Fluidigm Access  
762 Array™ system. *Tissue Antigens* **81**: 141–149. doi:10.1111/tan.12071
- 763 Morales, S. E., M. Meyer, K. Currie, and F. Baltar. 2018. Are oceanic fronts ecotones? Seasonal  
764 changes along the subtropical front show fronts as bacterioplankton transition zones but  
765 not diversity hotspots. *Environ Microbiol Rep* **10**: 184–189. doi:10.1111/1758-  
766 2229.12618
- 767 Morris, R. M., C. D. Frazar, and C. A. Carlson. 2012. Basin-scale patterns in the abundance of  
768 SAR11 subclades, marine Actinobacteria (OM1), members of the Roseobacter clade and  
769 OCS116 in the South Atlantic. *Environmental microbiology* **14**: 1133–1144.  
770 doi:10.1111/j.1462-2920.2011.02694.x
- 771 Oksanen, J., F. G. Blanchet, M. Friendly, and others. 2017. *vegan: Community Ecology*  
772 *Package*,.

- 773 Parada, A. E., D. M. Needham, and J. A. Fuhrman. 2016. Every base matters: assessing small  
774 subunit rRNA primers for marine microbiomes with mock communities, time series and  
775 global field samples. *Environmental microbiology* **18**: 1403–1414. doi:10.1111/1462-  
776 2920.13023
- 777 Paulson, J. N., O. C. Stine, H. C. Bravo, and M. Pop. 2013. Differential abundance analysis for  
778 microbial marker-gene surveys. *Nature methods* **10**: 1200–1202. doi:10.1038/nmeth.2658
- 779 Powley, H. R., M. D. Krom, and P. V. Cappellen. 2017. Understanding the unique  
780 biogeochemistry of the Mediterranean Sea: Insights from a coupled phosphorus and  
781 nitrogen model: P and N Cycling in the Mediterranean Sea. *Global Biogeochemical*  
782 *Cycles* **31**: 1010–1031. doi:10.1002/2017gb005648
- 783 Quero, G. M., and G. M. Luna. 2014. Diversity of rare and abundant bacteria in surface waters of  
784 the Southern Adriatic Sea. *Mar Genomics* **17**: 9–15. doi:10.1016/j.margen.2014.04.002
- 785 Raveh, O., N. David, G. Rilov, and E. Rahav. 2015. The Temporal Dynamics of Coastal  
786 Phytoplankton and Bacterioplankton in the Eastern Mediterranean Sea. *PloS one* **10**:  
787 e0140690. doi:10.1371/journal.pone.0140690
- 788 Salter, I., P. E. Galand, S. K. Fagervold, P. Lebaron, I. Obernosterer, M. J. Oliver, M. T. Suzuki,  
789 and C. Tricoire. 2015. Seasonal dynamics of active SAR11 ecotypes in the oligotrophic  
790 Northwest Mediterranean Sea. *The ISME journal* **9**: 347–360.  
791 doi:10.1038/ismej.2014.129
- 792 Schloss, P. D., S. L. Westcott, T. Ryabin, and others. 2009. Introducing mothur: open-source,  
793 platform-independent, community-supported software for describing and comparing  
794 microbial communities. *Applied and environmental microbiology* **75**: 7537–7541.  
795 doi:10.1128/AEM.01541-09

- 796 Smyth, T. J. 2011. Penetration of UV irradiance into the global ocean. *Journal of Geophysical*  
797 *Research* **116**. doi:10.1029/2011jc007183
- 798 Sunagawa, S., L. P. Coelho, S. Chaffron, and others. 2015. Ocean plankton. Structure and  
799 function of the global ocean microbiome. *Science (New York, N.Y.)* **348**: 1261359–  
800 1261359. doi:10.1126/science.1261359
- 801 Tanaka, T., T. F. Thingstad, U. Christaki, and others. 2011. Lack of P-limitation of  
802 phytoplankton and heterotrophic prokaryotes in surface waters of three anticyclonic  
803 eddies in the stratified Mediterranean Sea. *Biogeosciences* **8**: 525–538. doi:10.5194/bg-8-  
804 525-2011
- 805 Tedetti, M., and R. Sempéré. 2006. Penetration of ultraviolet radiation in the marine  
806 environment. A review. *Photochemistry and photobiology* **82**: 389–397.  
807 doi:10.1562/2005-11-09-IR-733
- 808 Thingstad, T. F., M. D. Krom, R. F. C. Mantoura, and others. 2005. Nature of phosphorus  
809 limitation in the ultraoligotrophic eastern Mediterranean. *Science (New York, N.Y.)* **309**:  
810 1068–1071. doi:10.1126/science.1112632
- 811 Tinta, T., J. Vojvoda, P. Mozetič, I. Talaber, M. Vodopivec, F. Malfatti, and V. Turk. 2015.  
812 Bacterial community shift is induced by dynamic environmental parameters in a  
813 changing coastal ecosystem (northern Adriatic, northeastern Mediterranean Sea) - a 2-  
814 year time-series study: Bacterial community shift in a dynamic coastal ecosystem.  
815 *Environmental Microbiology* **17**: 3581–3596. doi:10.1111/1462-2920.12519
- 816 Tsiola, A., P. Pitta, S. Fodelianakis, and others. 2016. Nutrient Limitation in Surface Waters of  
817 the Oligotrophic Eastern Mediterranean Sea: an Enrichment Microcosm Experiment.  
818 *Microbial Ecology* **71**: 575–588. doi:10.1007/s00248-015-0713-5

- 819 Vergin, K. L., B. Beszteri, A. Monier, and others. 2013. High-resolution SAR11 ecotype  
820 dynamics at the Bermuda Atlantic Time-series Study site by phylogenetic placement of  
821 pyrosequences. *The ISME journal* **7**: 1322–1332. doi:10.1038/ismej.2013.32
- 822 Volpe, G., R. Santoleri, V. Vellucci, M. R. d’Alcalà, S. Marullo, and F. D’Ortenzio. 2007. The  
823 colour of the Mediterranean Sea: Global versus regional bio-optical algorithms evaluation  
824 and implication for satellite chlorophyll estimates. *Remote Sensing of Environment* **107**:  
825 625–638. doi:10.1016/j.rse.2006.10.017
- 826 Wang, Z., D. L. Juarez, J.-F. Pan, S. K. Blinebry, J. Gronniger, J. S. Clark, Z. I. Johnson, and D.  
827 E. Hunt. 2019. Microbial communities across nearshore to offshore coastal transects are  
828 primarily shaped by distance and temperature. *Environmental Microbiology* **21**: 3862–  
829 3872. doi:10.1111/1462-2920.14734
- 830 Ward, C. S., C.-M. Yung, K. M. Davis, S. K. Blinebry, T. C. Williams, Z. I. Johnson, and D. E.  
831 Hunt. 2017. Annual community patterns are driven by seasonal switching between  
832 closely related marine bacteria. *The ISME journal* **11**: 1412–1422.  
833 doi:10.1038/ismej.2017.4
- 834 West, N. J., C. Lepère, C.-L. de O. Manes, P. Catala, D. J. Scanlan, and P. Lebaron. 2016.  
835 Distinct Spatial Patterns of SAR11, SAR86, and Actinobacteria Diversity along a  
836 Transect in the Ultra-oligotrophic South Pacific Ocean. *Frontiers in microbiology* **7**: 234.  
837 doi:10.3389/fmicb.2016.00234
- 838 Yogev, T., E. Rahav, E. Bar-Zeev, and others. 2011. Is dinitrogen fixation significant in the  
839 Levantine Basin, East Mediterranean Sea?: Eastern Mediterranean Sea N<sub>2</sub> fixation.  
840 *Environmental Microbiology* **13**: 854–871. doi:10.1111/j.1462-2920.2010.02402.x  
841
